# Supplementary material for: The Trajectory of KoRV-A Evolution Indicates Initial Integration into the Koala Germline Genome Near Coffs Harbour
Source: PubMed Central journal article supplement (PMC11703332; doi:10.21203/rs.3.rs-5671983/v1), 2024-12-23
Supplement: NIHPPRS5671983v1-supplement-1.pdf [file NIHPPRS5671983v1-supplement-1.pdf]

## Supplementary Files

This is a list of supplementary files associated with this preprint. Click to download.

- [1.Yuetal.SupplementalFigure.pdf](#)
- [2.Yuetal.SupplementalTables.zip](#)
